# Supplementary material for: UPF1 inhibits the hepatocellular carcinoma progression by targeting long non-coding RNA UCA1
Source: PubMed Central journal article supplement (PMC6491801; doi:10.1038/s41598-019-43148-z), 2019-04-30
Supplement: 41598_2019_43148_MOESM1_ESM.pdf [file 41598_2019_43148_MOESM1_ESM.pdf]

# **UPF1 inhibits the hepatocellular carcinoma progression by targeting long non-coding RNA UCA1**

Yongli Zhou<sup>1,3</sup>, Yandong Li<sup>2,3</sup>, Na Wang<sup>4</sup>, Xiuying Li<sup>5</sup>, Jianyun Zheng<sup>2,3</sup>, Liqiao Ge<sup>1,3</sup>

<sup>1</sup>Department of Gastroenterology, The First Affiliated Hospital of Xi'an Medical University, Xi'an, China

<sup>2</sup>Department of Pathology, The First Affiliated Hospital of Xi'an Medical University, Xi'an, China

<sup>3</sup>General Medical College, Xi'an Medical University, Xi'an, China

<sup>4</sup>Shanxi University of Traditional Chinese Medicine, Taiyuan, China

<sup>5</sup>Shanxi University of Traditional Chinese Medicine, Taiyuan, China

Running title: UPF1 inhibits HCC by UCA1

**\*Correspondence author:** Dr. Yandong Li, Department of Pathology, The First Affiliated Hospital of Xi'an Medical University, No.48 Fenggao West Road, Xi'an 710077, China

Email: liyandongzhongnan@163.com

## **Disclosure of conflict of interest**

None.

**Supplementary Table S1.** Relationship between expression of UPF1 and clinicopathological parameters in hepatocellular carcinoma

| Variable        | Cases | High expression (%) | Low expression (%) | $\chi^2$ | <i>P</i> value |
|-----------------|-------|---------------------|--------------------|----------|----------------|
| Gender          |       |                     |                    |          |                |
| Male            | 28    | 11 (39%)            | 17 (61%)           | 0.007    | 0.935          |
| Female          | 22    | 8 (36%)             | 14 (64%)           |          |                |
| Age             |       |                     |                    |          |                |
| ≤60             | 20    | 7 (35%)             | 13 (65%)           | 0.004    | 0.953          |
| >60             | 30    | 12 (40%)            | 18 (60%)           |          |                |
| Differentiation |       |                     |                    |          |                |
| High+ Median    | 27    | 15 (56%)            | 12 (44%)           | 6.144    | 0.013          |
| Low             | 23    | 4 (17%)             | 19 (83%)           |          |                |
| Stage           |       |                     |                    |          |                |
| I               | 15    | 6 (40%)             | 9 (60%)            | 0.028    | 0.867          |
| II              | 16    | 6 (38%)             | 10 (62%)           |          |                |
| III             | 19    | 7 (37%)             | 12 (63%)           |          |                |
| LN metastasis   |       |                     |                    |          |                |
| Positive        | 31    | 8 (26%)             | 23 (74%)           | 3.876    | 0.049          |
| Negative        | 19    | 11 (58%)            | 8 (42%)            |          |                |

**Supplementary Table S2.** Relationship between expression of UCA1 and clinicopathological parameters in hepatocellular carcinoma

| Variable        | Cases | High expression (%) | Low expression (%) | $\chi^2$ | <i>P</i> value |
|-----------------|-------|---------------------|--------------------|----------|----------------|
| Gender          |       |                     |                    |          |                |
| Male            | 28    | 15 (54%)            | 13 (46%)           | 0.004    | 0.945          |
| Female          | 22    | 12 (55%)            | 10 (45%)           |          |                |
| Age             |       |                     |                    |          |                |
| ≤60             | 20    | 11 (55%)            | 9 (45%)            | 0.030    | 0.861          |
| >60             | 30    | 17 (57%)            | 13 (43%)           |          |                |
| Differentiation |       |                     |                    |          |                |
| High+ Median    | 27    | 12 (44%)            | 15 (56%)           | 4.593    | 0.032          |
| Low             | 23    | 15 (65%)            | 8 (35%)            |          |                |
| Stage           |       |                     |                    |          |                |
| I               | 15    | 8 (53%)             | 7 (47%)            | 0.093    | 0.760          |
| II              | 16    | 9 (60%)             | 6 (40%)            |          |                |
| III             | 19    | 10 (53%)            | 9 (47%)            |          |                |
| LN metastasis   |       |                     |                    |          |                |
| Positive        | 31    | 25 (81%)            | 6 (19%)            | 4.563    | 0.033          |
| Negative        | 19    | 9 (47%)             | 10 (53%)           |          |                |

Figure S1

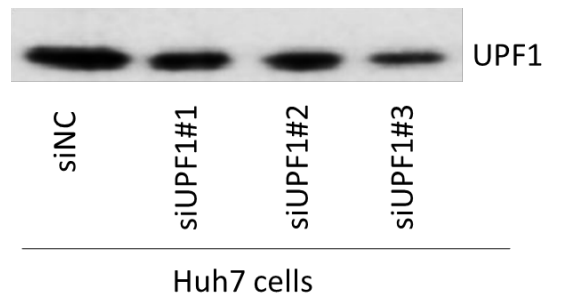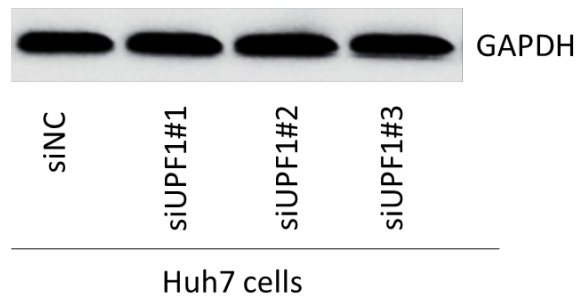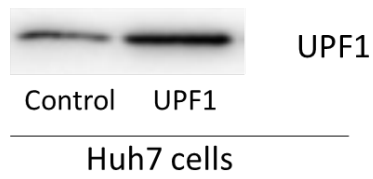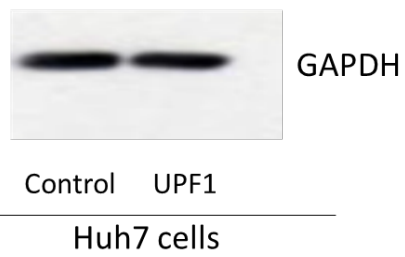

Figure S1: Full-length gel shown in Figure 2A.

Figure S2

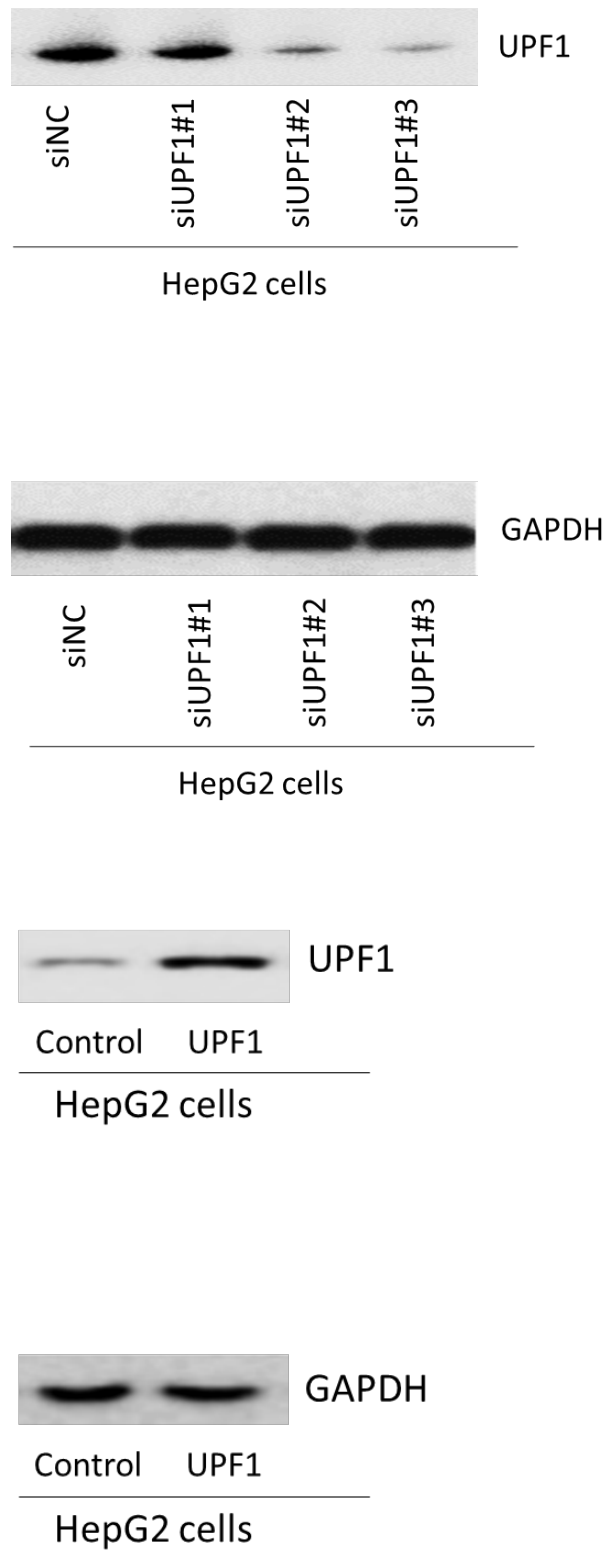

Figure S2: Full-length gel shown in Figure 2B.
